# Supplementary material
Source: MDPI journal article supplement (https://www.mdpi.com/2073-4344/13/7/1134)
Supplement: s1 [file s1]

## Supplementary Materials

# Photocatalytic Degradation of Ciprofloxacin with Supramolecular Materials Consisting of Nitrogenous Organic Cations and Metal Salts

Chenfei Ren, Jian Li, Xingxing Zhang and Yunyin Niu \*

Green catalysis center, and College of Chemistry, Zhengzhou University, Zhengzhou 450001, China

\* Correspondence: niuyy@zzu.edu.cn

**Table S1.** Crystal data and structural refinement details of complexes 1–5.

| Compounds                                                    | 1                                                                             | 2                                                                             | 3                                                                   | 4                                                                             | 5                                                                   |
|--------------------------------------------------------------|-------------------------------------------------------------------------------|-------------------------------------------------------------------------------|---------------------------------------------------------------------|-------------------------------------------------------------------------------|---------------------------------------------------------------------|
| Empirical formula                                            | C <sub>36</sub> H <sub>40</sub> Cu <sub>4</sub> I <sub>8</sub> N <sub>8</sub> | C <sub>36</sub> H <sub>40</sub> Ag <sub>4</sub> I <sub>8</sub> N <sub>8</sub> | C <sub>18</sub> H <sub>20</sub> Br <sub>4</sub> N <sub>4</sub> Zn   | C <sub>36</sub> H <sub>40</sub> Ag <sub>4</sub> I <sub>8</sub> N <sub>8</sub> | C <sub>18</sub> H <sub>20</sub> Br <sub>3</sub> CdClN <sub>4</sub>  |
| Formula weight                                               | 1854.12                                                                       | 2031.44                                                                       | 677.39                                                              | 1327.13                                                                       | 679.96                                                              |
| Temperature/K                                                | 300.00                                                                        | 300.00                                                                        | 291.00                                                              | 292.00                                                                        | 300.00                                                              |
| Crystal system                                               | Monoclinic                                                                    | Monoclinic                                                                    | Monoclinic                                                          | Triclinic                                                                     | Triclinic                                                           |
| Space group                                                  | P2 <sub>1</sub> /c                                                            | P2 <sub>1</sub> /c                                                            | P2 <sub>1</sub> /c                                                  | P-1                                                                           | P-1                                                                 |
| a/Å                                                          | 17.852 (2)                                                                    | 18.2328 (19)                                                                  | 12.204                                                              | 11.0705 (12)                                                                  | 9.9570 (4)                                                          |
| b/Å                                                          | 19.295 (3)                                                                    | 19.478 (2)                                                                    | 11.732                                                              | 11.9517 (13)                                                                  | 10.4582 (5)                                                         |
| c/Å                                                          | 14.226 (2)                                                                    | 14.3224 (15)                                                                  | 16.659                                                              | 17.722 (2)                                                                    | 11.6116 (5)                                                         |
| α/°                                                          | 90                                                                            | 90                                                                            | 90                                                                  | 77.569 (4)                                                                    | 91.005 (2)                                                          |
| β/°                                                          | 92.849 (5)                                                                    | 94.530 (4)                                                                    | 105.94                                                              | 80.559 (4)                                                                    | 106.308 (2)                                                         |
| γ/°                                                          | 90                                                                            | 90                                                                            | 90                                                                  | 67.721 (4)                                                                    | 104.270 (2)                                                         |
| Volume/Å <sup>3</sup>                                        | 4894.1 (12)                                                                   | 5070.6 (9)                                                                    | 2293.4                                                              | 2110.1 (4)                                                                    | 1119.78 (9)                                                         |
| Z                                                            | 4                                                                             | 4                                                                             | 4                                                                   | 2                                                                             | 2                                                                   |
| ρ <sub>calc</sub> /cm <sup>3</sup>                           | 2.516                                                                         | 2.661                                                                         | 1.962                                                               | 2.089                                                                         | 2.017                                                               |
| μ/mm <sup>−1</sup>                                           | 6.796                                                                         | 6.427                                                                         | 8.050                                                               | 4.171                                                                         | 6.458                                                               |
| F(000)                                                       | 3408.0                                                                        | 3696.0                                                                        | 1304.0                                                              | 1248.0                                                                        | 652.0                                                               |
| Crystal size/mm <sup>3</sup>                                 | 0.24 × 0.22 × 0.21                                                            | 0.23 × 0.22 × 0.12                                                            | 0.31 × 0.24 × 0.23                                                  | 0.27 × 0.23 × 0.22                                                            | 0.25 × 0.23 × 0.21                                                  |
| Reflections collected                                        | 142824                                                                        | 134714                                                                        | 104098                                                              | 44704                                                                         | 18296                                                               |
| Independent reflections/R <sub>int</sub> /R <sub>sigma</sub> | 11168<br>[R <sub>int</sub> = 0.0617,<br>R <sub>sigma</sub> = 0.0260]          | 11660<br>[R <sub>int</sub> = 0.1476,<br>R <sub>sigma</sub> = 0.0668]          | 5255<br>[R <sub>int</sub> = 0.1046,<br>R <sub>sigma</sub> = 0.0356] | 7438<br>[R <sub>int</sub> = 0.0410,<br>R <sub>sigma</sub> = 0.0265]           | 3925<br>[R <sub>int</sub> = 0.0545,<br>R <sub>sigma</sub> = 0.0402] |
| Data/restraints/parameters                                   | 11168/0/506                                                                   | 11660/0/507                                                                   | 5255/0/244                                                          | 7438/36/472                                                                   | 3925/0/244                                                          |
| Goodness-of-fit on F <sup>2</sup>                            | 1.125                                                                         | 1.006                                                                         | 1.058                                                               | 1.061                                                                         | 1.075                                                               |
| Final R indexes [I ≥ 2σ (I)]                                 | R <sub>1</sub> = 0.0511,<br>wR <sub>2</sub> = 0.1314                          | R <sub>1</sub> = 0.0388,<br>wR <sub>2</sub> = 0.0681                          | R <sub>1</sub> = 0.0455,<br>wR <sub>2</sub> = 0.0720                | R <sub>1</sub> = 0.0367,<br>wR <sub>2</sub> = 0.1065                          | R <sub>1</sub> = 0.0525,<br>wR <sub>2</sub> = 0.1592                |
| Final R indexes [all data]                                   | R <sub>1</sub> = 0.0626,<br>wR <sub>2</sub> = 0.1359                          | R <sub>1</sub> = 0.0895,<br>wR <sub>2</sub> = 0.0786                          | R <sub>1</sub> = 0.0875,<br>wR <sub>2</sub> = 0.0845                | R <sub>1</sub> = 0.0433,<br>wR <sub>2</sub> = 0.1099                          | R <sub>1</sub> = 0.0639,<br>wR <sub>2</sub> = 0.1674                |
| Largest diff. peak/hole / e Å <sup>−3</sup>                  | 1.75/−1.16                                                                    | 0.93/−1.06                                                                    | 0.94/−0.66                                                          | 1.55/−1.66                                                                    | 1.07/−2.15                                                          |

**Table S2.** The main bond length and bond angle of compounds 1–5.

| Compound 1  |             |             |             |             |             |
|-------------|-------------|-------------|-------------|-------------|-------------|
| I2-Cu2-Cu1  | 110.46 (6)  | I2-Cu2-Cu3  | 59.23 (5)   | I2-Cu2-Cu4  | 58.91 (5)   |
| I3-Cu2-Cu1  | 56.01 (5)   | I3-Cu2-Cu3  | 58.33 (5)   | I4-Cu2-I2   | 108.96 (6)  |
| I4-Cu2-I3   | 104.39 (6)  | I4-Cu2-I6   | 109.86 (6)  | I4-Cu2-Cu1  | 140.29 (7)  |
| I4-Cu2-Cu3  | 143.33 (7)  | I4-Cu2-Cu4  | 148.46 (8)  | I6-Cu2-I3   | 108.88 (6)  |
| I6-Cu2-Cu1  | 57.77 (5)   | I6-Cu2-Cu3  | 106.51 (6)  | I6-Cu2-Cu4  | 59.13 (5)   |
| Cu3-Cu2-Cu1 | 60.58 (6)   | Cu4-Cu2-I3  | 107.15 (6)  | Cu4-Cu2-Cu1 | 62.68 (5)   |
| Cu4-Cu2-Cu3 | 59.62 (5)   | I1-Cu3-I2   | 104.16 (6)  | I1-Cu3-I3   | 106.75 (6)  |
| I1-Cu3-I8   | 112.12 (6)  | I1-Cu3-Cu1  | 147.37 (8)  | I1-Cu3-Cu2  | 140.87 (7)  |
| I1-Cu3-Cu4  | 143.98 (7)  | I2-Cu3-I3   | 111.61 (6)  | I2-Cu3-Cu1  | 108.12 (6)  |
| I2-Cu3-Cu2  | 56.90 (5)   | I2-Cu3-Cu4  | 58.17 (5)   | I3-Cu3-Cu1  | 56.54 (4)   |
| I3-Cu3-Cu2  | 60.64 (5)   | I3-Cu3-Cu4  | 109.01 (6)  | I8-Cu3-I2   | 113.01 (6)  |
| I8-Cu3-I3   | 108.97 (6)  | I8-Cu3-Cu1  | 58.63 (4)   | I8-Cu3-Cu2  | 106.96 (6)  |
| I8-Cu3-Cu4  | 59.33 (5)   | Cu2-Cu3-Cu1 | 60.11 (5)   | Cu4-Cu3-Cu1 | 62.50 (5)   |
| Cu4-Cu3-Cu2 | 59.60 (5)   | I2-Cu4-I6   | 110.97 (5)  | I2-Cu4-I8   | 113.00 (6)  |
| I2-Cu4-Cu1  | 106.91 (5)  | I2-Cu4-Cu2  | 57.64 (4)   | I2-Cu4-Cu3  | 59.26 (5)   |
| I6-Cu4-I8   | 107.66 (6)  | I6-Cu4-Cu1  | 56.49 (4)   | I6-Cu4-Cu2  | 58.39 (5)   |
| I6-Cu4-Cu3  | 106.86 (6)  | I7-Cu4-I2   | 110.53 (6)  | I7-Cu4-I6   | 107.74 (6)  |
| I7-Cu4-I8   | 106.70 (5)  | I7-Cu4-Cu1  | 142.56 (7)  | I7-Cu4-Cu2  | 146.13 (7)  |
| I7-Cu4-Cu3  | 145.17 (7)  | I8-Cu4-Cu1  | 57.39 (4)   | I8-Cu4-Cu2  | 107.03 (6)  |
| I8-Cu4-Cu3  | 58.23 (5)   | Cu2-Cu4-Cu1 | 59.61 (5)   | Cu2-Cu4-Cu3 | 60.78 (6)   |
| Cu3-Cu4-Cu1 | 59.91 (5)   |             |             |             |             |
| Compound 2  |             |             |             |             |             |
| I1-Ag1      | 2.7851 (8)  | I2-Ag1      | 2.8605 (8)  | I2-Ag2      | 2.9475 (8)  |
| I2-Ag3      | 2.8952 (8)  | I3-Ag2      | 2.7456 (7)  | I4-Ag1      | 3.0278 (8)  |
| I4-Ag2      | 2.9617 (8)  | I4-Ag4      | 2.8817 (7)  | I5-Ag2      | 2.8887 (7)  |
| I5-Ag3      | 2.9580 (8)  | I5-Ag4      | 2.9709 (8)  | I6-Ag3      | 2.7597 (7)  |
| I7-Ag4      | 2.7660 (8)  | I8-Ag1      | 2.9169 (8)  | I8-Ag3      | 2.9290 (8)  |
| I8-Ag4      | 2.9107 (8)  | Ag1-Ag2     | 3.1826 (9)  | Ag1-Ag3     | 3.0621 (9)  |
| Ag1-Ag4     | 3.1622 (9)  | Ag2-Ag3     | 3.0862 (8)  | Ag2-Ag4     | 3.1432 (9)  |
| Ag3-Ag4     | 3.2632 (8)  | Ag1-I2-Ag2  | 66.44 (2)   | Ag1-I2-Ag3  | 64.28 (2)   |
| Ag3-I2-Ag2  | 63.763 (18) | Ag2-I4-Ag1  | 64.185 (18) | Ag4-I4-Ag1  | 64.645 (19) |
| Ag4-I4-Ag2  | 65.07 (2)   | Ag2-I5-Ag3  | 63.707 (18) | Ag2-I5-Ag4  | 64.86 (2)   |
| Ag3-I5-Ag4  | 66.787 (19) | Ag1-I8-Ag3  | 63.17 (2)   | Ag4-I8-Ag1  | 65.72 (2)   |
| Ag4-I8-Ag3  | 67.944 (18) | I1-Ag1-I2   | 110.26 (2)  | I1-Ag1-I4   | 105.51 (2)  |
| I1-Ag1-I8   | 110.67 (2)  | I1-Ag1-Ag2  | 144.49 (3)  | I1-Ag1-Ag3  | 148.04 (3)  |
| I1-Ag1-Ag4  | 140.18 (3)  | I2-Ag1-I4   | 108.66 (2)  | I2-Ag1-I8   | 113.06 (2)  |
| I2-Ag1-Ag2  | 58.092 (18) | I2-Ag1-Ag3  | 58.410 (19) | I2-Ag1-Ag4  | 109.14 (2)  |
| I4-Ag1-Ag2  | 56.899 (19) | I4-Ag1-Ag3  | 106.45 (2)  | I4-Ag1-Ag4  | 55.440 (18) |
| I8-Ag1-I4   | 108.36 (2)  | I8-Ag1-Ag2  | 104.45 (2)  | I8-Ag1-Ag3  | 58.606 (19) |
| I8-Ag1-Ag4  | 57.044 (18) | Ag3-Ag1-Ag2 | 59.198 (19) | Ag3-Ag1-Ag4 | 63.21 (2)   |
| Ag4-Ag1-Ag2 | 59.39 (2)   | I2-Ag2-I4   | 108.13 (2)  | I2-Ag2-Ag1  | 55.471 (19) |
| I2-Ag2-Ag3  | 57.294 (19) | I2-Ag2-Ag4  | 107.41 (2)  | I3-Ag2-I2   | 102.17 (2)  |
| I3-Ag2-I4   | 108.06 (2)  | I3-Ag2-I5   | 115.15 (2)  | I3-Ag2-Ag1  | 138.67 (3)  |
| I3-Ag2-Ag3  | 143.19 (3)  | I3-Ag2-Ag4  | 149.66 (3)  | I4-Ag2-Ag1  | 58.916 (19) |
| I4-Ag2-Ag3  | 107.51 (2)  | I4-Ag2-Ag4  | 56.239 (18) | I5-Ag2-I2   | 112.48 (2)  |
| I5-Ag2-I4   | 110.36 (2)  | I5-Ag2-Ag1  | 105.92 (2)  | I5-Ag2-Ag3  | 59.240 (18) |
| I5-Ag2-Ag4  | 58.833 (17) | Ag3-Ag2-Ag1 | 58.45 (2)   | Ag3-Ag2-Ag4 | 63.172 (18) |
| Ag4-Ag2-Ag1 | 59.980 (19) | I2-Ag3-I5   | 111.98 (2)  | I2-Ag3-I8   | 111.69 (2)  |
| I2-Ag3-Ag1  | 57.310 (18) | I2-Ag3-Ag2  | 58.943 (18) | I2-Ag3-Ag4  | 105.60 (2)  |

|             |             |             |             |             |             |
|-------------|-------------|-------------|-------------|-------------|-------------|
| I5-Ag3-Ag1  | 107.31 (2)  | I5-Ag3-Ag2  | 57.053 (18) | I5-Ag3-Ag4  | 56.795 (17) |
| I6-Ag3-I2   | 112.18 (2)  | I6-Ag3-I5   | 106.36 (2)  | I6-Ag3-I8   | 108.21 (2)  |
| I6-Ag3-Ag1  | 146.11 (3)  | I6-Ag3-Ag2  | 144.59 (3)  | I6-Ag3-Ag4  | 142.21 (3)  |
| I8-Ag3-I5   | 106.07 (2)  | I8-Ag3-Ag1  | 58.220 (18) | I8-Ag3-Ag2  | 106.61 (2)  |
| I8-Ag3-Ag4  | 55.761 (18) | Ag1-Ag3-Ag2 | 62.35 (2)   | Ag1-Ag3-Ag4 | 59.889 (19) |
| Ag2-Ag3-Ag4 | 59.266 (19) | I4-Ag4-I5   | 110.30 (2)  | I4-Ag4-I8   | 112.66 (2)  |
| I4-Ag4-Ag1  | 59.914 (19) | I4-Ag4-Ag2  | 58.696 (17) | I4-Ag4-Ag3  | 104.92 (2)  |
| I5-Ag4-Ag1  | 104.46 (2)  | I5-Ag4-Ag2  | 56.305 (18) | I5-Ag4-Ag3  | 56.419 (18) |
| I7-Ag4-I4   | 114.27 (2)  | I7-Ag4-I5   | 106.26 (2)  | I7-Ag4-I8   | 106.63 (2)  |
| I7-Ag4-Ag1  | 148.47 (3)  | I7-Ag4-Ag2  | 146.77 (3)  | I7-Ag4-Ag3  | 140.80 (2)  |
| I8-Ag4-I5   | 106.21 (2)  | I8-Ag4-Ag1  | 57.233 (19) | I8-Ag4-Ag2  | 105.60 (2)  |
| I8-Ag4-Ag3  | 56.295 (18) | Ag1-Ag4-Ag3 | 56.896 (19) | Ag2-Ag4-Ag1 | 60.63 (2)   |
| Ag2-Ag4-Ag3 | 57.561 (18) |             |             |             |             |
| Compound 3  |             |             |             |             |             |
| Zn-Br1      | 2.3980 (8)  | Br1-Zn-Br2  | 113.27 (3)  | Br4-Zn-Br1  | 108.75 (3)  |
| Zn-Br2      | 2.4085 (8)  | Br3-Zn-Br1  | 108.27 (3)  | Br4-Zn-Br2  | 105.96 (3)  |
| Zn-Br3      | 2.3881 (9)  | Br3-Zn-Br2  | 107.34 (3)  |             |             |
| Zn-Br4      | 2.3927 (8)  | Br3-Zn-Br4  | 113.34 (3)  |             |             |
| Compound 4  |             |             |             |             |             |
| I4-Ag1      | 2.8756 (7)  | I3-Ag1      | 2.8889 (12) | I1-Ag1      | 2.8567 (7)  |
| I2-Ag1      | 2.8271 (7)  | Ag1-I3A     | 3.16 (5)    | I4-Ag1-I3   | 126.86 (5)  |
| I4-Ag1-I3A  | 132.1 (4)   | I1-Ag1-I4   | 109.49 (2)  | I1-Ag1-I3   | 102.32 (3)  |
| I1-Ag1-I3A  | 102.8 (3)   | I2-Ag1-I4   | 103.21 (2)  | I2-Ag1-I3   | 96.96 (6)   |
| I2-Ag1-I1   | 118.75 (2)  | I2-Ag1-I3A  | 90.6 (5)    |             |             |
| Compound 5  |             |             |             |             |             |
| Cd1-Cl1     | 2.4742 (18) | Cd1-Br2     | 2.5971 (10) | Cd1-Br3     | 2.5297 (10) |
| Cd1-Br4     | 2.5531 (12) | Cl1-Cd1-Br2 | 105.35 (6)  | Cl1-Cd1-Br3 | 113.42 (5)  |
| Cl1-Cd1-Br4 | 105.21 (6)  | Br3-Cd1-Br2 | 112.06 (4)  | Br3-Cd1-Br4 | 116.33 (4)  |
| Br4-Cd1-Br2 | 103.39 (4)  |             |             |             |             |
